# Supplementary material
Source: publisher figshare collection journal article supplement (https://acs.figshare.com/ndownloader/files/13082708)
Supplement: Supplementary file 1 [file 13082708]

## **Supporting Information for**

### **An Ultra-Compact Nano-Theranostic PEG Platform for Cancer Applications**

Thomas Hopkins<sup>1†</sup>, Scott D. Swanson<sup>2†</sup>, Jeremy Damon Hoff<sup>1</sup>, Natalie Potter<sup>1</sup>, Rahil Ukani<sup>1</sup>, Raoul Kopelman<sup>1\*</sup>

† = authors of equal contribution

<sup>1</sup>University of Michigan LSA Chemistry; 930 N University Ave, Ann Arbor, MI 48109

<sup>2</sup>University of Michigan Radiology; 1301 Chatherine St, Ann Arbor, MI 48109

#### **Corresponding author:**

Dr. Raoul Kopelman, 930 N. University Avenue Ann Arbor, Michigan, Tel: 734-764-7541; Fax: 734-936-2778; **E-mail:** [kopelman@umich.edu](mailto:kopelman@umich.edu)

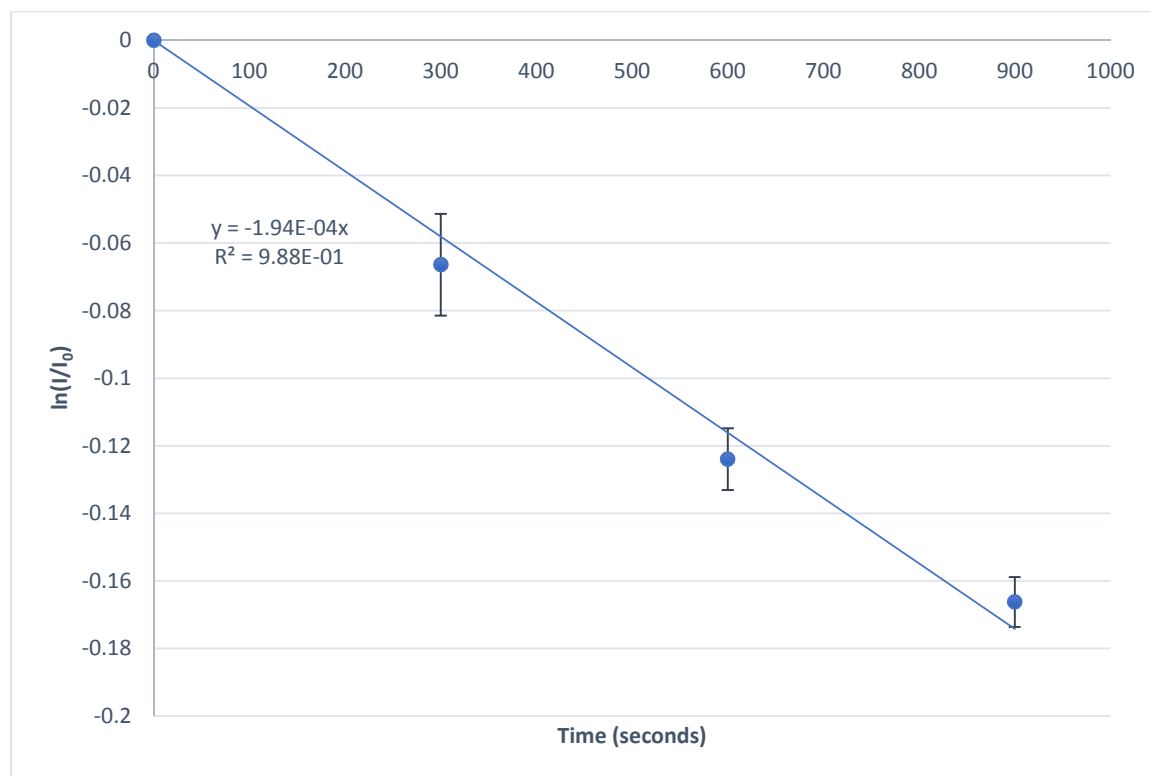

Figure S1: *k-value* plot of Ce6 encapsulated in PAAm NP as tracked by ADPA fluorescence quenching over time. The 660 nm OD = 0.12 in PBS; the slope of the plot is the *k-value*.

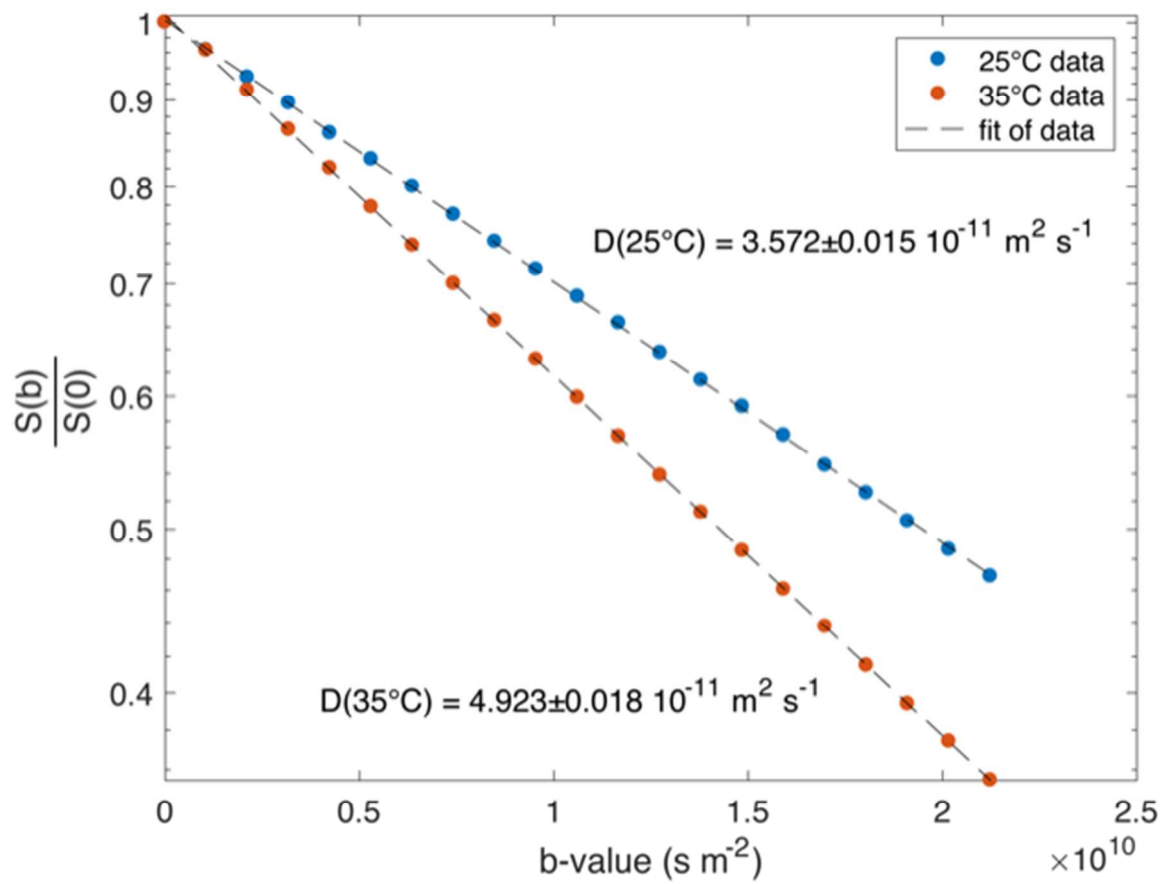

Figure S2: Plot of 8PEGA MR signal decay vs applied magnetic gradient ( $b$  value). The slope of the best fits corresponds with the transitional diffusion coefficient,  $D$ , in the Stokes-Einstein equation.

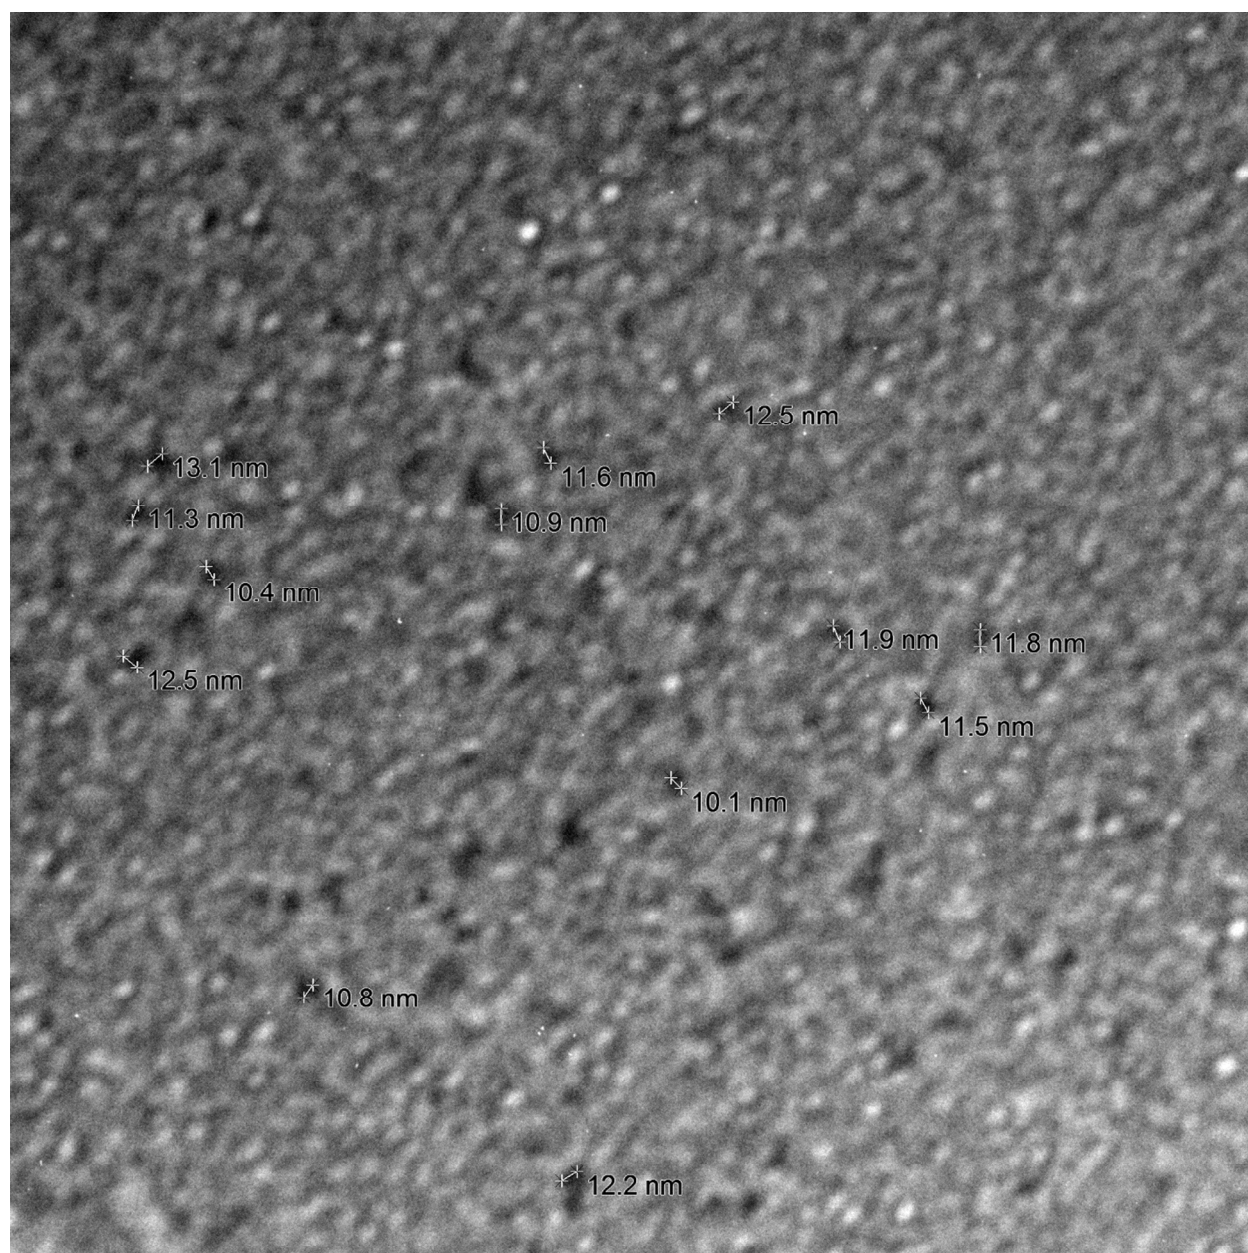

8pega stained.tif  
 Print Mag: 207000x @ 7.0 in  
 13:20:35 5/18/2018

100 nm  
 HV=90.0kV  
 Direct Mag: 30000x  
 Bottom Camera-MIL

Figure S3: TEM of 8PEGA stained with uranyl acetate. TEMs are taken by placing copper grids into the microscope while wet to utilize surface tension as a way of maintaining the hydrated 8PEGA conformation when exposed to the high vacuum environment. The low electronically dense material can be reasonably visualized.
